# Supplementary material for: The three major axes of terrestrial ecosystem function
Source: PubMed Central journal article supplement (PMC8528706; doi:10.1038/s41586-021-03939-9), 2021-09-22
Supplement: 41586_2021_3939_MOESM4_ESM.pdf [file 41586_2021_3939_MOESM4_ESM.pdf]

## SUPPLEMENTARY TABLE 1 | FLUXNET sites

List of FLUXNET sites used in the analysis. Coordinates (Latitude and Longitude), plant functional type (IGBP class), Köppen Geiger class, Nitrogen content (N%), maximum Leaf Area Index (LAI<sub>max</sub>), maximum vegetation height (Hc), and aboveground biomass from GlobBiomass dataset (AGB) are reported. The FLUXNET release database from which the sites come from is also indicated: F15 for FLUXNET2015 and LT for the LT database. In bold the sites that have been used for the runs of the land surface models.

| Site code     | PFT        | Köppen-Geiger | Latitude       | Longitude       | Dataset    | N% [gN 100gleaf <sup>-1</sup> ] | LAI <sub>max</sub> [m <sup>2</sup> m <sup>-2</sup> ] | Hc [m]      | AGB [t DM ha <sup>-1</sup> ] | Ref |
|---------------|------------|---------------|----------------|-----------------|------------|---------------------------------|------------------------------------------------------|-------------|------------------------------|-----|
| AR-Vir        | ENF        | Cfa           | -28.240        | -56.189         | F15        |                                 |                                                      | 14.4        | 196                          | 1   |
| <b>AT-Neu</b> | <b>GRA</b> | <b>Dfc</b>    | <b>47.117</b>  | <b>11.318</b>   | <b>F15</b> | <b>2.906</b>                    | <b>6.5</b>                                           | <b>0.7</b>  | <b>32</b>                    | 2   |
| AU-Ade        | SAV        | Aw            | -13.077        | 131.118         | F15        |                                 | 2.04                                                 | 12.5        |                              | 3   |
| AU-ASM        | ENF        | BSh           | -22.283        | 133.249         | F15        | 1.776                           | 0.47                                                 | 6.5         | 0                            | 4   |
| AU-Cpr        | SAV        | Bsk           | -34.002        | 140.589         | F15        | 1.243                           | 0.782                                                | 3           | 0                            | 5,6 |
| AU-Cum        | EBF        | Cfa           | -33.613        | 150.723         | F15        | 1.100                           | 2.0332                                               | 23          | 71                           | 7   |
| AU-DaP        | GRA        | Aw            | -14.063        | 131.318         | F15        |                                 |                                                      | 1           | 0                            | 7   |
| AU-DaS        | SAV        | Aw            | -14.159        | 131.388         | F15        |                                 | 1.8768                                               | 16.4        | 47                           | 8   |
| AU-Dry        | SAV        | Aw            | -15.259        | 132.371         | F15        |                                 | 1.66                                                 | 12.3        | 18                           | 9   |
| AU-Emr        | GRA        | BSh           | -23.859        | 148.475         | F15        |                                 |                                                      | 0.6         | 0                            | 10  |
| AU-Fog        | WET        | Aw            | -12.545        | 131.307         | F15        |                                 | 3.4408                                               | 1           |                              | 11  |
| AU-Gin        | SAV        | Csa           | -31.376        | 115.714         | F15        |                                 | 1.4076                                               | 6.8         | 82                           |     |
| <b>AU-How</b> | <b>SAV</b> | <b>Aw</b>     | <b>-12.494</b> | <b>131.152</b>  | <b>F15</b> |                                 | <b>2.4</b>                                           | <b>16</b>   |                              | 12  |
| AU-RDF        | SAV        | Aw            | -14.564        | 132.478         | F15        |                                 |                                                      | 16          | 32                           | 13  |
| AU-Rig        | GRA        | Cfb           | -36.650        | 145.576         | F15        |                                 |                                                      | 0.4         | 0                            | 7   |
| AU-Stp        | GRA        | BSh           | -17.151        | 133.350         | F15        |                                 |                                                      | 1           | 0                            | 7   |
| AU-TTE        | OSH        | BSh           | -22.287        | 133.640         | F15        |                                 | 0.4692                                               | 5           | 0                            |     |
| <b>AU-Wac</b> | <b>EBF</b> | <b>Cfb</b>    | <b>-37.426</b> | <b>145.188</b>  | <b>F15</b> |                                 | <b>5.01</b>                                          | <b>80</b>   | <b>348</b>                   | 14  |
| AU-Whr        | EBF        | Cfb           | -36.673        | 145.029         | F15        |                                 | 1.4076                                               | 28          | 138                          | 15  |
| AU-Wom        | EBF        | Cfb           | -37.422        | 144.094         | F15        |                                 | 6.4124                                               | 22          | 223                          |     |
| AU-Ync        | GRA        | Bsk           | -34.989        | 146.291         | F15        |                                 |                                                      | 0.5         | 0                            | 16  |
| <b>BE-Bra</b> | <b>MF</b>  | <b>Cfb</b>    | <b>51.309</b>  | <b>4.521</b>    | <b>F15</b> | <b>2.314</b>                    | <b>2.1</b>                                           | <b>21.7</b> | <b>128</b>                   | 17  |
| BE-Vie        | MF         | Cfb           | 50.305         | 5.998           | F15        | 1.050                           | 5.1                                                  | 34.6        | 167                          | 18  |
| BR-Ban        | EBF        | Aw            | -9.824         | -50.159         | LT         |                                 |                                                      | 18          | 143                          | 19  |
| <b>BR-Ma2</b> | <b>EBF</b> | <b>Aw</b>     | <b>-2.609</b>  | <b>-60.209</b>  | <b>LT</b>  | <b>4.435</b>                    | <b>5.16</b>                                          | <b>35</b>   | <b>276</b>                   | 20  |
| BR-Sa1        | EBF        | Am            | -2.857         | -54.959         | F15        | 2.219                           | 5.18                                                 | 40          | 250.5                        | 21  |
| BR-Sa3        | EBF        | Am            | -3.018         | -54.971         | F15        |                                 | 5.21                                                 | 30          | 268                          | 21  |
| <b>BW-Ma1</b> | <b>SAV</b> | <b>BSh</b>    | <b>-19.916</b> | <b>23.560</b>   | <b>LT</b>  |                                 | <b>1.1</b>                                           | <b>8</b>    | <b>6</b>                     | 22  |
| CA-Ca1        | ENF        | Cfb           | 49.867         | -125.334        | LT         | 1.350                           | 8.4                                                  | 32.5        | 240                          | 23  |
| CA-Ca2        | ENF        | Cfb           | 49.870         | -125.291        | LT         | 1.000                           | 1.365                                                | 1           | 82                           | 23  |
| CA-Ca3        | ENF        | Cfb           | 49.535         | -124.900        | LT         | 1.000                           | 4.7                                                  | 7.57        | 152.5                        | 23  |
| CA-Gro        | MF         | Dfb           | 48.217         | -82.156         | F15        | 1.466                           | 4.3                                                  | 31          | 98                           | 24  |
| CA-Let        | GRA        | Dfb           | 49.709         | -112.940        | LT         | 2.025                           | 1.22                                                 | 0.365       | 0                            | 25  |
| CA-Mer        | WET        | Dfb           | 45.409         | -75.519         | LT         | 0.920                           | 1.3                                                  | 0.25        | 14                           | 26  |
| CA-NS1        | ENF        | Dfc           | 55.879         | -98.484         | F15        | 0.675                           | 5.68                                                 | 16          | 47                           | 27  |
| CA-NS2        | ENF        | Dfc           | 55.906         | -98.525         | F15        | 0.657                           | 7.8                                                  | 16          | 38                           | 6   |
| CA-NS3        | ENF        | Dfc           | 55.912         | -98.382         | F15        | 1.110                           | 5.33                                                 | 4           | 36                           | 6   |
| CA-NS5        | ENF        | Dfc           | 55.863         | -98.485         | F15        | 0.915                           | 5.49                                                 | 5           | 51                           | 6   |
| CA-NS6        | OSH        | Dfc           | 55.917         | -98.964         | F15        | 1.950                           | 2.97                                                 | 2           | 51                           | 6   |
| CA-NS7        | OSH        | Dfc           | 56.636         | -99.948         | F15        | 1.360                           | 1.36                                                 | 1           | 37                           | 6   |
| CA-Oas        | DBF        | Dfc           | 53.629         | -106.198        | F15        | 2.376                           | 3.04                                                 | 21          | 89                           | 28  |
| CA-Obs        | ENF        | Dfc           | 53.987         | -105.118        | F15        | 0.843                           | 3.41                                                 | 11          | 53                           | 29  |
| CA-Ojp        | ENF        | Dfc           | 53.916         | -104.692        | LT         | 1.099                           | 2.06                                                 | 16.7        | 92                           | 30  |
| CA-Qcu        | ENF        | Dfc           | 49.267         | -74.036         | LT         |                                 | 0.77                                                 | 2           | 27                           | 31  |
| <b>CA-Qfo</b> | <b>ENF</b> | <b>Dfc</b>    | <b>49.693</b>  | <b>-74.342</b>  | <b>F15</b> | <b>0.754</b>                    | <b>3.7</b>                                           | <b>13.8</b> | <b>44</b>                    | 32  |
| CA-SF1        | ENF        | Dfc           | 54.485         | -105.818        | F15        | 0.950                           | 3.4                                                  | 6           | 85                           | 33  |
| CA-SF2        | ENF        | Dfc           | 54.254         | -105.878        | F15        | 1.070                           | 3                                                    | 4           | 57                           | 33  |
| <b>CA-SF3</b> | <b>OSH</b> | <b>Dfc</b>    | <b>54.092</b>  | <b>-106.005</b> | <b>F15</b> | <b>1.350</b>                    | <b>1.1</b>                                           | <b>18</b>   | <b>57</b>                    | 33  |
| CA-SJ1        | ENF        | Dfc           | 53.908         | -104.656        | LT         | 1.500                           | 1.14                                                 | 1.7         | 61                           | 34  |
| CA-SJ2        | ENF        | Dfc           | 53.945         | -104.649        | LT         |                                 | 0.18                                                 | 0.19        | 52                           | 35  |
| CA-TP1        | ENF        | Dfb           | 42.661         | -80.560         | F15        | 2.130                           | 0.45                                                 | 6.5         | 54                           | 36  |
| CA-TP2        | ENF        | Dfb           | 42.774         | -80.459         | F15        | 1.340                           | 12.8                                                 | 11.5        | 112                          | 36  |
| CA-TP3        | ENF        | Dfb           | 42.707         | -80.348         | F15        | 1.130                           | 5.9                                                  | 16.2        | 206                          | 36  |
| CA-TP4        | ENF        | Dfb           | 42.710         | -80.357         | F15        | 1.385                           | 8                                                    | 23.4        | 197                          | 37  |

|               |            |            |               |               |            |              |             |                |            |       |
|---------------|------------|------------|---------------|---------------|------------|--------------|-------------|----------------|------------|-------|
| CA-TPD        | DBF        | Dfb        | 42.635        | -80.558       | F15        |              | 3.98        | 25.7           | 190        | 37    |
| CA-WP1        | WET        | Dfc        | 54.954        | -112.467      | LT         | 1.150        | 2.61        | 3.4            | 56         | 38    |
| CG-Tch        | SAV        | Aw         | -4.289        | 11.656        | F15        |              |             | 2              | 4          |       |
| CH-Cha        | GRA        | Cfb        | 47.210        | 8.410         | F15        | 2.626        |             | 0.5            | 15         | 39    |
| CH-Dav        | ENF        | ET         | 46.815        | 9.856         | F15        | 1.130        | 5.5         | 25             | 102        | 40,41 |
| CH-Fru        | GRA        | Cfb        | 47.116        | 8.538         | F15        | 2.135        |             | 0.4            | 42         | 42    |
| <b>CH-Oe1</b> | <b>GRA</b> | <b>Cfb</b> | <b>47.286</b> | <b>7.732</b>  | <b>F15</b> |              | <b>4.85</b> | <b>0.55</b>    | <b>0</b>   | 43    |
| CN-Cha        | MF         | Dwb        | 42.403        | 128.096       | F15        | 1.910        | 6           | 32             | 117        | 44    |
| CN-Cng        | GRA        | Dwa        | 44.593        | 123.509       | F15        |              |             | 0.75           | 0          |       |
| CN-Din        | EBF        | Cfa        | 23.173        | 112.536       | F15        | 1.720        | 4           | 17             | 91         |       |
| CN-Du2        | GRA        | Dwb        | 42.047        | 116.284       | F15        |              |             | 0.5            | 0          | 45    |
| CN-Ha2        | WET        | ET         | 37.609        | 101.327       | F15        |              | 2.8         | 0.65           | 0          |       |
| CN-HaM        | GRA        | ET         | 37.370        | 101.180       | F15        | 2.938        | 2.8         | 0.3            | 0          | 46    |
| CN-Qia        | ENF        | Cfa        | 26.741        | 115.058       | F15        | 1.230        | 3.5         | 11             | 88         |       |
| CZ-BK2        | GRA        | Dfb        | 49.494        | 18.543        | F15        |              |             | 0.1            | 169        |       |
| CZ-wet        | WET        | Cfb        | 49.025        | 14.770        | F15        |              |             | 1              | 22         |       |
| DE-Akm        | WET        | Cfb        | 53.866        | 13.683        | F15        |              |             | 4              | 49         |       |
| <b>DE-Bay</b> | <b>ENF</b> | <b>Cfb</b> | <b>50.142</b> | <b>11.867</b> | <b>LT</b>  |              | <b>5.6</b>  | <b>25</b>      | <b>163</b> | 47    |
| DE-Gri        | GRA        | Cfb        | 50.950        | 13.513        | F15        |              |             | 0.82           | 142        | 48    |
| <b>DE-Hai</b> | <b>DBF</b> | <b>Cfb</b> | <b>51.079</b> | <b>10.453</b> | <b>F15</b> | <b>2.317</b> | <b>6.6</b>  | <b>35</b>      | <b>185</b> | 49    |
| DE-Lkb        | ENF        | Cfb        | 49.100        | 13.305        | F15        |              |             | 2              | 70         | 50    |
| DE-Lnf        | DBF        | Cfb        | 51.328        | 10.368        | F15        |              | 4.2         | 35             | 142        | 51    |
| <b>DE-Meh</b> | <b>MF</b>  | <b>Cfb</b> | <b>51.275</b> | <b>10.656</b> | <b>LT</b>  | <b>1.410</b> | <b>2.9</b>  | <b>0.5</b>     | <b>0</b>   | 52    |
| DE-Obe        | ENF        | Cfb        | 50.784        | 13.720        | F15        |              |             | 20.5           | 163        |       |
| DE-SfN        | WET        | Cfb        | 47.806        | 11.328        | F15        |              |             | 2              | 65         |       |
| DE-Spw        | WET        | Cfb        | 51.892        | 14.034        | F15        |              |             | 23.8           | 141        |       |
| <b>DE-Tha</b> | <b>ENF</b> | <b>Cfb</b> | <b>50.964</b> | <b>13.567</b> | <b>F15</b> | <b>1.400</b> | <b>7.6</b>  | <b>29.4</b>    | <b>188</b> | 53    |
| DE-Wet        | ENF        | Cfb        | 50.453        | 11.458        | LT         | 1.400        | 7.7         | 22             | 214.5      | 51    |
| DK-NuF        | WET        | ET         | 64.131        | -51.386       | F15        |              |             | 0.1            |            | 54    |
| <b>DK-Sor</b> | <b>DBF</b> | <b>Cfb</b> | <b>55.486</b> | <b>11.645</b> | <b>F15</b> | <b>2.270</b> | <b>5</b>    | <b>29.2</b>    | <b>123</b> | 55    |
| DK-ZaH        | GRA        | ET         | 74.473        | -20.550       | F15        |              |             | 0.1            |            | 56    |
| <b>ES-ES1</b> | <b>ENF</b> | <b>Csa</b> | <b>39.346</b> | <b>-0.319</b> | <b>LT</b>  |              | <b>3.63</b> | <b>10</b>      |            | 57    |
| ES-LgS        | OSH        | Csa        | 37.098        | -2.966        | F15        |              |             | 0.2            |            | 58    |
| ES-LJu        | OSH        | Csa        | 36.927        | -2.752        | F15        |              |             | 0.5            |            | 59    |
| <b>ES-LMa</b> | <b>SAV</b> | <b>Csa</b> | <b>39.942</b> | <b>-5.773</b> | <b>LT</b>  | <b>1.320</b> | <b>2</b>    | <b>8</b>       |            | 60    |
| ES-VDA        | GRA        | Cfb        | 42.152        | 1.449         | LT         |              | 1.4         | 0.1            | 96         |       |
| <b>FI-Hyy</b> | <b>ENF</b> | <b>Dfc</b> | <b>61.848</b> | <b>24.295</b> | <b>F15</b> | <b>1.258</b> | <b>6.7</b>  | <b>18.45</b>   | <b>105</b> | 61    |
| FI-Kaa        | WET        | Dfc        | 69.141        | 27.295        | LT         |              | 0.7         | 0.5            | 19         | 62    |
| FI-Let        | ENF        | Dfc        | 60.642        | 23.960        | F15        |              |             | 19.2           | 123        | 63    |
| FI-Lom        | WET        | Dfc        | 67.997        | 24.209        | F15        |              | 1           | 0.58           | 40         | 64    |
| FI-Sod        | ENF        | Dfc        | 67.362        | 26.638        | F15        | 1.050        | 1.2         | 13.5           | 56         | 65    |
| FR-Fon        | DBF        | Cfb        | 48.476        | 2.780         | F15        | 2.400        | 5.2         | 27.7           | 132        | 66    |
| <b>FR-Hes</b> | <b>DBF</b> | <b>Cfb</b> | <b>48.674</b> | <b>7.065</b>  | <b>LT</b>  | <b>2.300</b> | <b>4.6</b>  | <b>16</b>      | <b>127</b> | 67    |
| <b>FR-LBr</b> | <b>ENF</b> | <b>Cfb</b> | <b>44.717</b> | <b>-0.769</b> | <b>F15</b> | <b>1.260</b> | <b>3.2</b>  | <b>21.9775</b> | <b>71</b>  | 68    |
| <b>FR-Pue</b> | <b>EBF</b> | <b>Csa</b> | <b>43.741</b> | <b>3.596</b>  | <b>F15</b> | <b>1.230</b> | <b>2.9</b>  | <b>6.3684</b>  | <b>96</b>  | 69    |
| GF-Guy        | EBF        | Am         | 5.279         | -52.925       | F15        | 1.590        | 6.74        | 35             | 275.5      | 70    |
| GH-Ank        | EBF        | Aw         | 5.269         | -2.694        | F15        |              |             | 27             | 184        | 71    |
| HU-Bug        | GRA        | Cfb        | 46.691        | 19.601        | LT         | 2.150        | 4.7         | 0.5            | 0          |       |
| HU-Mat        | GRA        | Cfb        | 47.847        | 19.726        | LT         |              |             | 0.2            | 110        |       |
| IE-Dri        | GRA        | Cfb        | 51.987        | -8.752        | LT         |              |             |                | 5          |       |
| <b>IL-Yat</b> | <b>ENF</b> | <b>BSh</b> | <b>31.345</b> | <b>35.051</b> | <b>LT</b>  | <b>0.974</b> | <b>2.5</b>  | <b>10</b>      | <b>0</b>   | 72    |
| IS-Gun        | DBF        | Cfb        | 63.833        | -20.217       | LT         |              |             |                | 0          |       |
| <b>IT-Amp</b> | <b>GRA</b> | <b>Cfa</b> | <b>41.904</b> | <b>13.605</b> | <b>LT</b>  | <b>1.599</b> | <b>2.5</b>  | <b>0.4</b>     | <b>36</b>  | 73    |
| IT-CA1        | DBF        | Csa        | 42.380        | 12.027        | F15        |              |             | 5.5013         | 0          | 74    |
| IT-CA3        | DBF        | Csa        | 42.380        | 12.022        | F15        |              |             | 7.5            | 0          | 74    |
| IT-Col        | DBF        | Csa        | 41.849        | 13.588        | F15        | 2.503        | 6.6         | 22.5           | 168        | 75    |
| IT-Cp2        | EBF        | Csa        | 41.704        | 12.357        | F15        |              |             | 12.8           | 115        | 76    |
| <b>IT-Cpz</b> | <b>EBF</b> | <b>Csa</b> | <b>41.705</b> | <b>12.376</b> | <b>F15</b> | <b>1.500</b> | <b>3.5</b>  | <b>15</b>      | <b>139</b> | 77    |
| IT-La2        | ENF        | Cfb        | 45.954        | 11.285        | F15        |              |             | 28             | 180        | 78    |
| IT-Mal        | GRA        | Cfb        | 46.117        | 11.703        | LT         |              |             | 0.2            | 157        | 73    |
| <b>IT-MBo</b> | <b>GRA</b> | <b>Dfb</b> | <b>46.015</b> | <b>11.046</b> | <b>F15</b> | <b>2.139</b> | <b>2.5</b>  | <b>0.3</b>     | <b>30</b>  | 79    |
| IT-Noe        | CSH        | Csa        | 40.606        | 8.152         | F15        |              | 2.1         | 1.2            | 97         | 80    |
| IT-Non        | MF         | Cfa        | 44.690        | 11.089        | LT         |              | 1.7         | 7              | 0          | 81    |
| <b>IT-PT1</b> | <b>DBF</b> | <b>Cfa</b> | <b>45.201</b> | <b>9.061</b>  | <b>F15</b> |              | <b>4.45</b> | <b>26.6</b>    | <b>28</b>  | 82    |
| IT-Ren        | ENF        | Dfc        | 46.587        | 11.434        | F15        | 1.237        | 5.11        | 29             | 144.5      | 83    |
| IT-Ro1        | DBF        | Csa        | 42.408        | 11.930        | F15        |              | 4.3         | 8              | 77         | 84    |
| <b>IT-Ro2</b> | <b>DBF</b> | <b>Csa</b> | <b>42.390</b> | <b>11.921</b> | <b>F15</b> |              | <b>4.08</b> | <b>16</b>      | <b>94</b>  | 85    |
| IT-Tor        | GRA        | Dfc        | 45.844        | 7.578         | F15        | 1.130        | 2.2         | 0.2            | 70         | 86    |
| JP-Tef        | MF         | Cfa        | 45.056        | 142.106       | LT         | 1.630        | 7.4         | 25             | 111        |       |
| JP-Tom        | MF         | Cfa        | 42.739        | 141.515       | LT         |              | 9.2         | 15             | 55         | 87    |
| MY-PSO        | EBF        | Af         | 2.973         | 102.306       | F15        | 2.099        | 6.52        | 35             | 315        | 88    |

|        |     |     |        |          |     |       |        |       |     |         |
|--------|-----|-----|--------|----------|-----|-------|--------|-------|-----|---------|
| NL-Ca1 | GRA | Cfb | 51.971 | 4.927    | LT  |       | 3      | 1     | 3   | 89      |
| NL-Loo | ENF | Cfb | 52.167 | 5.744    | F15 | 1.992 | 2.1    | 18.7  | 154 | 90      |
| NO-Adv | WET | ET  | 78.186 | 15.923   | F15 |       |        | 0.4   |     |         |
| PA-SPn | DBF | Am  | 9.318  | -79.635  | F15 | 1.555 | 5.4    | 12    | 24  | 91      |
| PA-SPs | GRA | Am  | 9.314  | -79.631  | F15 |       |        | 0.09  | 27  | 91      |
| PT-Esp | EBF | Csa | 38.639 | -8.602   | LT  |       | 4.5    | 20    | 0   | 92      |
| PT-Mi1 | EBF | Csa | 38.541 | -8.000   | LT  | 1.500 | 2.3    | 8     | 0   | 93      |
| PT-Mi2 | GRA | Csa | 38.477 | -8.025   | LT  |       | 2.5    | 0.5   | 0   | 93      |
| RU-Che | WET | Dfc | 68.613 | 161.341  | F15 |       |        | 0.675 | 0   | 94      |
| RU-Cok | OSH | Dsc | 70.829 | 147.494  | F15 |       | 1.5    | 0.5   | 0   | 95      |
| RU-Fyo | ENF | Dfb | 56.462 | 32.922   | F15 | 1.260 | 3      | 27.5  | 141 | 96      |
| RU-Ha1 | GRA | Dwc | 54.725 | 90.002   | F15 |       |        | 0.5   | 0   | 97      |
| RU-SkP | DNF | Dfb | 62.255 | 129.168  | F15 |       | 1      | 18    | 17  |         |
| RU-Zot | ENF | Dfc | 60.801 | 89.351   | LT  | 0.990 | 1.5    | 15    | 82  | 98      |
| SD-Dem | SAV | BWh | 13.283 | 30.478   | F15 |       | 1.4    | 5     | 0   | 99      |
| SE-Deg | WET | Dfc | 64.183 | 19.550   | LT  |       | 0.9    | 0.05  | 26  | 100     |
| SE-Fla | ENF | Dfc | 64.113 | 19.457   | LT  | 1.150 | 3.4    | 12.7  | 88  | 47      |
| SE-St1 | WET | ET  | 68.354 | 19.050   | F15 |       |        | 0.05  | 34  | 101     |
| SN-Dhr | SAV | BWh | 15.403 | -15.432  | F15 |       |        | 1.58  | 0   | 102     |
| UK-EBu | GRA | Cfb | 55.866 | -3.206   | LT  |       | 3.9    | 0.4   | 18  |         |
| UK-Gri | ENF | Cfb | 56.607 | -3.798   | LT  | 0.900 | 7      | 12    | 186 | 103     |
| US-AR1 | GRA | Cfa | 36.427 | -99.420  | F15 |       |        | 0.5   | 0   | 104     |
| US-AR2 | GRA | Cfa | 36.636 | -99.598  | F15 |       |        | 0.5   | 0   | 105     |
| US-Atq | WET | ET  | 70.470 | -157.409 | F15 |       | 1.1    | 0.3   | 0   |         |
| US-Bkg | GRA | Dfa | 44.345 | -96.836  | LT  |       | 3      | 0.3   | 0   | 106     |
| US-Blo | ENF | Csa | 38.895 | -120.633 | F15 | 1.407 | 4.63   | 2.59  | 236 | 107     |
| US-Brw | WET | ET  | 71.323 | -156.626 | LT  |       | 1.1    | 0.1   | 0   | 108     |
| US-Cop | GRA | Dfa | 38.090 | -109.390 | F15 |       |        | 0.5   | 0   | 109     |
| US-Dk1 | GRA | Cfa | 35.971 | -79.093  | LT  |       | 2      | 0.55  | 136 |         |
| US-Dk2 | DBF | Cfa | 35.974 | -79.100  | LT  | 1.850 | 7.03   | 25    | 141 | 110     |
| US-FPe | GRA | BSk | 48.308 | -105.102 | LT  |       | 2.5    | 0.3   | 0   |         |
| US-FR2 | SAV | Cfa | 29.949 | -97.996  | LT  | 1.750 | 2.8    |       | 43  | 111     |
| US-GBT | ENF | Dfc | 41.366 | -106.240 | F15 |       | 3      | 14.9  | 108 |         |
| US-GLE | ENF | Dfc | 41.367 | -106.240 | F15 |       | 4.5    | 14.9  | 108 |         |
| US-Goo | GRA | Cfa | 34.255 | -89.874  | F15 |       | 2      | 0.35  | 26  | 112     |
| US-Ha1 | DBF | Dfb | 42.538 | -72.172  | F15 | 1.972 | 5.2    | 25.4  | 187 | 113     |
| US-Ho1 | ENF | Dfb | 45.204 | -68.740  | LT  | 1.160 | 5.8    | 20    | 194 | 114     |
| US-Ivo | WET | ET  | 68.487 | -155.750 | F15 |       |        | 0.3   | 0   | 115     |
| US-KS2 | CSH | Cfa | 28.609 | -80.672  | F15 | 1.200 | 2.5    | 1.5   | 30  | 116     |
| US-Los | WET | Dfb | 46.083 | -89.979  | F15 | 2.036 | 4.24   | 2     | 63  | 117,118 |
| US-LPH | DBF | Dfb | 42.542 | -72.185  | LT  |       | 4.5    | 16.5  | 150 |         |
| US-Me2 | ENF | Csb | 44.452 | -121.557 | F15 | 1.140 | 3.58   | 16.5  | 171 | 119     |
| US-Me3 | ENF | Csb | 44.315 | -121.608 | F15 | 1.130 | 0.52   | 3.11  | 84  | 120     |
| US-Me4 | ENF | Csb | 44.499 | -121.622 | F15 | 1.100 | 2      | 16.5  | 134 | 121     |
| US-Me5 | ENF | Csb | 44.437 | -121.567 | F15 | 1.010 | 1.1    | 4.3   | 120 | 122     |
| US-Me6 | ENF | Csb | 44.323 | -121.608 | F15 | 1.240 | 1.8    | 6.51  | 85  | 123     |
| US-MMS | DBF | Cfa | 39.323 | -86.413  | F15 | 2.060 | 4.62   | 27    | 178 | 124     |
| US-MOz | DBF | Cfa | 38.744 | -92.200  | LT  | 1.587 | 4.01   | 24.2  | 188 | 125     |
| US-Myb | WET | Csa | 38.050 | -121.765 | F15 |       |        | 2.664 | 13  |         |
| US-NR1 | ENF | Dfc | 40.033 | -105.546 | F15 | 0.983 | 3.65   | 15.9  | 105 | 126     |
| US-Oho | DBF | Dfa | 41.555 | -83.844  | F15 |       | 4      | 24.5  | 100 | 127     |
| US-Prr | ENF | Dsc | 65.124 | -147.488 | F15 |       | 0.73   | 2.53  | 29  | 128,129 |
| US-SO2 | CSH | Csa | 33.374 | -116.623 | LT  | 0.913 | 3      | 1     | 3   | 130     |
| US-SO3 | CSH | Csa | 33.377 | -116.623 | LT  | 0.913 | 1.1    | 0.5   | 5   | 130     |
| US-SO4 | CSH | Csa | 33.384 | -116.640 | LT  | 0.913 | 3      | 2.3   | 6   | 130     |
| US-SP1 | ENF | Cfa | 29.738 | -82.219  | LT  | 1.120 | 5.5    | 24.2  | 166 | 131     |
| US-SP2 | ENF | Cfa | 29.765 | -82.245  | LT  | 0.950 | 7.29   | 10.1  | 168 | 131     |
| US-SP3 | ENF | Cfa | 29.755 | -82.163  | LT  | 0.950 | 6.63   | 14    | 191 | 131     |
| US-SRC | OSH | BSk | 31.908 | -110.840 | F15 |       |        | 1.7   | 0   |         |
| US-SRG | GRA | BSk | 31.789 | -110.828 | F15 | 1.770 | 1.7    | 0.5   | 0   | 132     |
| US-SRM | SAV | BSk | 31.821 | -110.866 | F15 | 3.043 | 0.5    | 2.5   | 0   | 133     |
| US-Syv | MF  | Dfb | 46.242 | -89.348  | F15 | 1.958 | 7.53   | 27.5  | 124 | 134     |
| US-Ton | SAV | Csa | 38.432 | -120.966 | F15 | 2.130 | 3.28   | 10.64 | 0   | 135     |
| US-Tw1 | WET | Csa | 38.107 | -121.647 | F15 |       |        | 3.43  | 0   |         |
| US-UMB | DBF | Dfb | 45.560 | -84.714  | F15 | 1.753 | 7.76   | 23    | 144 | 136     |
| US-Umd | DBF | Dfb | 45.563 | -84.698  | F15 |       | 4.52   | 23    | 139 | 137     |
| US-Var | GRA | Csa | 38.413 | -120.951 | F15 | 2.300 | 3.9525 | 0.705 | 1   | 138     |
| US-WCr | DBF | Dfb | 45.806 | -90.080  | F15 | 1.877 | 5.36   | 24.3  | 95  | 118     |
| US-Whs | OSH | BSk | 31.744 | -110.052 | F15 |       | 0.57   | 1     | 0   |         |
| US-Wi3 | DBF | Dfb | 46.635 | -91.099  | F15 |       | 3.9    | 20.5  | 75  | 139     |
| US-Wi4 | ENF | Dfb | 46.739 | -91.166  | F15 |       | 2.8    | 18    | 126 | 139     |

|               |            |            |                |                |            |              |             |           |           |                |
|---------------|------------|------------|----------------|----------------|------------|--------------|-------------|-----------|-----------|----------------|
| US-Wkg        | GRA        | BSk        | 31.737         | -109.942       | F15        | 2.640        | 0.9         | 0.5       | 0         | <sup>140</sup> |
| US-WPT        | WET        | Dfa        | 41.465         | -82.996        | F15        |              |             | 1.7       | 6         |                |
| US-Wrc        | ENF        | Csb        | 45.820         | -121.952       | LT         | 0.750        | 8.7         | 24.3      | 224       | <sup>141</sup> |
| VU-Coc        | <b>EBF</b> | <b>Af</b>  | <b>-15.443</b> | <b>167.192</b> | <b>LT</b>  |              | <b>5.65</b> | <b>16</b> | <b>29</b> | <sup>142</sup> |
| <b>ZA-Kru</b> | <b>SAV</b> | <b>Cwa</b> | <b>-25.020</b> | <b>31.497</b>  | <b>F15</b> | <b>1.890</b> | <b>0.42</b> | <b>10</b> | <b>17</b> | <sup>143</sup> |
| ZM-Mon        | SAV        | Aw         | -15.438        | 23.253         | F15        |              | 1.7         | 12        |           |                |

## REFERENCES

- 1 Posse, G., Lewczuk, N., Richter, K. & Cristiano, P. Carbon and water vapor balance in a subtropical pine plantation. *iForest - Biogeosciences and Forestry* **9**, 736-742, doi:10.3832/ifor1815-009 (2016).
- 2 Wohlfahrt, G., Hammerle, A., Haslwanter, A., Bahn, M., Tappeiner, U. & Cernusca, A. Seasonal and inter-annual variability of the net ecosystem CO<sub>2</sub> exchange of a temperate mountain grassland: Effects of weather and management. *Journal of Geophysical Research Atmospheres* **113**, doi:10.1029/2007JD009286 (2008).
- 3 Beringer, J., Hacker, J., Hutley, L. B., Leuning, R., Arndt, S. K., Amiri, R., Bannehr, L., Cernusak, L. A., Grover, S., Hensley, C., Hocking, D., Isaac, P., Jamali, H., Kanniah, K., Livesley, S., Neininger, B., U, K. T. P., Sea, W., Straten, D., Tapper, N., Weinmann, R., Wood, S. & Zegelin, S. SPECIAL—Savanna Patterns of Energy and Carbon Integrated across the Landscape. *Bulletin of the American Meteorological Society* **92**, 1467-1485, doi:10.1175/2011bams2948.1 (2011).
- 4 Cleverly, J., Boulain, N., Villalobos-Vega, R., Grant, N., Faux, R., Wood, C., Cook, P. G., Yu, Q., Leigh, A. & Eamus, D. Dynamics of component carbon fluxes in a semi-arid Acacia woodland, central Australia. *Journal of Geophysical Research: Biogeosciences* **118**, 1168-1185, doi:10.1002/jgrg.20101 (2013).
- 5 Meyer, W. S., Kondrlovà, E. & Koerber, G. R. Evaporation of perennial semi-arid woodland in southeastern Australia is adapted for irregular but common dry periods. *Hydrological Processes* **29**, 3714-3726, doi:10.1002/hyp.10467 (2015).
- 6 Bloomfield, K. J., Cernusak, L. A., Eamus, D., Ellsworth, D. S., Colin Prentice, I., Wright, I. J., Boer, M. M., Bradford, M. G., Cale, P., Cleverly, J., Egerton, J. J. G., Evans, B. J., Hayes, L. S., Hutchinson, M. F., Liddell, M. J., Macfarlane, C., Meyer, W. S., Prober, S. M., Togashi, H. F., Wardlaw, T., Zhu, L. & Atkin, O. K. A continental-scale assessment of variability in leaf traits: Within species, across sites and between seasons. *Funct. Ecol.* **32**, 1492-1506, doi:10.1111/1365-2435.13097 (2018).
- 7 Beringer, J., Hutley, L. B., McHugh, I., Arndt, S. K., Campbell, D., Cleugh, H. A., Cleverly, J., Resco de Dios, V., Eamus, D., Evans, B., Ewenz, C., Grace, P., Griebel, A., Haverd, V., Hinko-Najera, N., Huete, A., Isaac, P., Kanniah, K., Leuning, R., Liddell, M. J., Macfarlane, C., Meyer, W., Moore, C., Pendall, E., Phillips, A., Phillips, R. L., Prober, S. M., Restrepo-Coupe, N., Rutledge, S., Schroder, I., Silberstein, R., Southall, P., Yee, M. S., Tapper, N. J., van Gorsel, E., Vote, C., Walker, J. & Wardlaw, T. An introduction to the Australian and New Zealand flux tower network – OzFlux. *Biogeosciences* **13**, 5895-5916, doi:10.5194/bg-13-5895-2016 (2016).
- 8 Hutley, L. B., Beringer, J., Isaac, P. R., Hacker, J. M. & Cernusak, L. A. A sub-continental scale living laboratory: Spatial patterns of savanna vegetation over a rainfall gradient in northern Australia. *Agricultural and Forest Meteorology* **151**, 1417-1428, doi:https://doi.org/10.1016/j.agrformet.2011.03.002 (2011).

- 9 Cernusak, L. A., Hutley, L. B., Beringer, J., Holtum, J. A. M. & Turner, B. L. Photosynthetic physiology of eucalypts along a sub-continental rainfall gradient in northern Australia. *Agricultural and Forest Meteorology* **151**, 1462-1470, doi:<https://doi.org/10.1016/j.agrformet.2011.01.006> (2011).
- 10 Schroder, I., Kuske, T. & Zegelin, S. Eddy Covariance Dataset for Arcturus (2011-2013). *Geoscience Australia*, doi:[doi:10.1001/14249](https://doi.org/10.1001/14249), 2014. (2014).
- 11 Guerschman, J. P., Van Dijk, A. I. J. M., Mattersdorf, G., Beringer, J., Hutley, L. B., Leuning, R., Pipunic, R. C. & Sherman, B. S. Scaling of potential evapotranspiration with MODIS data reproduces flux observations and catchment water balance observations across Australia. *Journal of Hydrology* **369**, 107-119, doi:[10.1016/j.jhydrol.2009.02.013](https://doi.org/10.1016/j.jhydrol.2009.02.013) (2009).
- 12 Beringer, J., Hutley, L. B., Tapper, N. J., Coutts, A., Kerley, A. & O'Grady, A. P. Fire impacts on surface heat, moisture and carbon fluxes from a tropical savanna in northern Australia. *Int. J. Wildland Fire* **12**, 333-340 (2003).
- 13 Bristow, M., Hutley, L. B., Beringer, J., Livesley, S. J., Edwards, A. C. & Arndt, S. K. Quantifying the relative importance of greenhouse gas emissions from current and future savanna land use change across northern Australia. *Biogeosciences* **13**, 6285-6303, doi:[10.5194/bg-13-6285-2016](https://doi.org/10.5194/bg-13-6285-2016) (2016).
- 14 Beringer, J., Hutley, L., Kilinc, M., McGuire, A. D. & McHugh, I. Water, energy and carbon fluxes from the world's tallest anigospERM (Eucalyptus regnans) at Wallaby Creek, south-eastern Australia. *International Geographical Union Conference "regional Responses to Global Changes: A View from the Antipodes"*, Brisbane, 2006 (2006).
- 15 McHugh, I. D., Beringer, J., Cunningham, S. C., Baker, P. J., Cavagnaro, T. R., Mac Nally, R. & Thompson, R. M. Interactions between nocturnal turbulent flux, storage and advection at an "ideal" eucalypt woodland site. *Biogeosciences* **14**, 3027-3050, doi:[10.5194/bg-14-3027-2017](https://doi.org/10.5194/bg-14-3027-2017) (2017).
- 16 Yee, M. S., Pauwels, V. R. N., Daly, E., Beringer, J., Rüdiger, C., McCabe, M. F. & Walker, J. P. A comparison of optical and microwave scintillometers with eddy covariance derived surface heat fluxes. *Agricultural and Forest Meteorology* **213**, 226-239, doi:<https://doi.org/10.1016/j.agrformet.2015.07.004> (2015).
- 17 Carrara, A., Janssens, I. A., Curiel Yuste, J. & Ceulemans, R. Seasonal changes in photosynthesis, respiration and NEE of a mixed temperate forest. *Agricultural and Forest Meteorology* **126**, 15-31, doi:[10.1016/j.agrformet.2004.05.002](https://doi.org/10.1016/j.agrformet.2004.05.002) (2004).
- 18 Aubinet, M., Chermanne, B., Vandenhaute, M., Longdoz, B., Yernaux, M. & Laitat, E. Long term carbon dioxide exchange above a mixed forest in the Belgian Ardennes. *Agricultural and Forest Meteorology* **108**, 293-315, doi:[10.1016/S0168-1923\(01\)00244-1](https://doi.org/10.1016/S0168-1923(01)00244-1) (2001).
- 19 Borma, L. S., Da Rocha, H. R., Cabral, O. M., Von Randow, C., Collicchio, E., Kurzatkowski, D., Brugger, P. J., Freitas, H., Tannus, R., Oliveira, L., Rennó, C. D. & Artaxo, P. Atmosphere and hydrological controls of the evapotranspiration over a floodplain forest in the Bananal Island region, Amazonia. *Journal of Geophysical Research: Biogeosciences* **114**, doi:[10.1029/2007JG000641](https://doi.org/10.1029/2007JG000641) (2009).

- 20 Araújo, A. C., Nobre, A. D., Kruijt, B., Elbers, J. A., Dallarosa, R., Stefani, P., von Randow, C., Manzi, A. O., Culf, A. D., Gash, J. H. C., Valentini, R. & Kabat, P. Comparative measurements of carbon dioxide fluxes from two nearby towers in a central Amazonian rainforest: The Manaus LBA site. *Journal of Geophysical Research: Atmospheres* **107**, LBA 58-51-LBA 58-20, doi:10.1029/2001jd000676 (2002).
- 21 Saleska, S. R., Miller, S. D., Matross, D. M., Goulden, M. L., Wofsy, S. C., Da Rocha, H. R., De Camargo, P. B., Crill, P., Daube, B. C., De Freitas, H. C., Huttyra, L., Keller, M., Kirchhoff, V., Menton, M., Munger, J. W., Pyle, E. H., Rice, A. H. & Silva, H. Carbon in Amazon Forests: Unexpected Seasonal Fluxes and Disturbance-Induced Losses. *Science* **302**, 1554-1557, doi:10.1126/science.1091165 (2003).
- 22 Veenendaal, E. M., Kolle, O. & Lloyd, J. Seasonal variation in energy fluxes and carbon dioxide exchange for a broad-leaved semi-arid savanna (Mopane woodland) in Southern Africa. *Global Change Biol.* **10**, 318-328, doi:10.1111/j.1365-2486.2003.00699.x (2004).
- 23 Humphreys, E. R., Black, T. A., Morgenstern, K., Cai, T., Drewitt, G. B., Nestic, Z. & Trofymow, J. A. Carbon dioxide fluxes in coastal Douglas-fir stands at different stages of development after clearcut harvesting. *Agricultural and Forest Meteorology* **140**, 6-22, doi:10.1016/j.agrformet.2006.03.018 (2006).
- 24 Pejam, M. R., Arain, M. A. & McCaughey, J. H. Energy and water vapour exchanges over a mixedwood boreal forest in Ontario, Canada. *Hydrological Processes* **20**, 3709-3724, doi:10.1002/hyp.6384 (2006).
- 25 Flanagan, L. B., Wever, L. A. & Carlson, P. J. Seasonal and interannual variation in carbon dioxide exchange and carbon balance in a northern temperate grassland. *Global Change Biol.* **8**, 599-615, doi:10.1046/j.1365-2486.2002.00491.x (2002).
- 26 Lafleur, P. M., Roulet, N. T., Bubier, J. L., Froelking, S. & Moore, T. R. Interannual variability in the peatland-atmosphere carbon dioxide exchange at an ombrotrophic bog. *Global Biogeochemical Cycles* **17**, 5-1 (2003).
- 27 Goulden, M. L., Winston, G. C., McMillan, A. M. S., Litvak, M. E., Read, E. L., Rocha, A. V. & Rob Elliot, J. An eddy covariance mesonet to measure the effect of forest age on land-atmosphere exchange. *Global Change Biol.* **12**, 2146-2162, doi:10.1111/j.1365-2486.2006.01251.x (2006).
- 28 Black, T. A., Den Hartog, G., Neumann, H. H., Blanken, P. D., Yang, P. C., Russell, C., Nestic, Z., Lee, X., Chen, S. G., Staebler, R. & Novak, M. D. Annual cycles of water vapour and carbon dioxide fluxes in and above a boreal aspen forest. *Global Change Biol.* **2**, 219-229, doi:10.1111/j.1365-2486.1996.tb00074.x (1996).
- 29 Jarvis, P. G., Massheder, J. M., Hale, S. E., Moncrieff, J. B., Rayment, M. & Scott, S. L. Seasonal variation of carbon dioxide, water vapor, and energy exchanges of a boreal black spruce forest. *Journal of Geophysical Research Atmospheres* **102**, 28953-28966 (1997).
- 30 Baldocchi, D. D., Vogel, C. A. & Hall, B. Seasonal variation of energy and water vapor exchange rates above and below a boreal jack pine forest canopy. *Journal of Geophysical Research Atmospheres* **102**, 28939-28951 (1997).

- 31 Giasson, M. A., Coursolle, C. & Margolis, H. A. Ecosystem-level CO<sub>2</sub> fluxes from a boreal cutover in eastern Canada before and after scarification. *Agricultural and Forest Meteorology* **140**, 23-40, doi:10.1016/j.agrformet.2006.08.001 (2006).
- 32 Bergeron, O., Margolis, H. A., Black, T. A., Coursolle, C., Dunn, A. L., Barr, A. G. & Wofsy, S. C. Comparison of carbon dioxide fluxes over three boreal black spruce forests in Canada. *Global Change Biol.* **13**, 89-107, doi:10.1111/j.1365-2486.2006.01281.x (2007).
- 33 Mkhabela, M. S., Amiro, B. D., Barr, A. G., Black, T. A., Hawthorne, I., Kidston, J., McCaughey, J. H., Orchansky, A. L., Nesic, Z., Sass, A., Shashkov, A. & Zha, T. Comparison of carbon dynamics and water use efficiency following fire and harvesting in Canadian boreal forests. *Agricultural and Forest Meteorology* **149**, 783-794, doi:https://doi.org/10.1016/j.agrformet.2008.10.025 (2009).
- 34 Howard, E. A., Gower, S. T., Foley, J. A. & Kucharik, C. J. Effects of logging on carbon dynamics of a jack pine forest in Saskatchewan, Canada. *Global Change Biol.* **10**, 1267-1284, doi:10.1111/j.1529-8817.2003.00804.x (2004).
- 35 Coursolle, C., Margolis, H. A., Giasson, M. A., Bernier, P. Y., Amiro, B. D., Arain, M. A., Barr, A. G., Black, T. A., Goulden, M. L., McCaughey, J. H., Chen, J. M., Dunn, A. L., Grant, R. F. & Lafleur, P. M. Influence of stand age on the magnitude and seasonality of carbon fluxes in Canadian forests. *Agricultural and Forest Meteorology* **165**, 136-148, doi:10.1016/j.agrformet.2012.06.011 (2012).
- 36 Peichl, M. & Arain, M. A. Allometry and partitioning of above- and belowground tree biomass in an age-sequence of white pine forests. *For. Ecol. Manage.* **253**, 68-80, doi:10.1016/j.foreco.2007.07.003 (2007).
- 37 Arain, M. A. & Restrepo-Coupe, N. Net ecosystem production in a temperate pine plantation in southeastern Canada. *Agricultural and Forest Meteorology* **128**, 223-241, doi:10.1016/j.agrformet.2004.10.003 (2005).
- 38 Syed, K. H., Flanagan, L. B., Carlson, P. J., Glenn, A. J. & Van Gaalen, K. E. Environmental control of net ecosystem CO<sub>2</sub> exchange in a treed, moderately rich fen in northern Alberta. *Agricultural and Forest Meteorology* **140**, 97-114, doi:10.1016/j.agrformet.2006.03.022 (2006).
- 39 Merbold, L., Eugster, W., Stieger, J., Zahniser, M., Nelson, D. & Buchmann, N. Greenhouse gas budget (CO<sub>2</sub>, CH<sub>4</sub> and N<sub>2</sub>O) of intensively managed grassland following restoration. *Global Change Biol.* **20**, 1913-1928, doi:10.1111/gcb.12518 (2014).
- 40 Wolf, S., Eugster, W., Ammann, C., Häni, M., Zielis, S., Hiller, R., Stieger, J., Imer, D., Merbold, L. & Buchmann, N. Contrasting response of grassland versus forest carbon and water fluxes to spring drought in Switzerland. *Environ. Res. Lett.* **8**, doi:10.1088/1748-9326/8/3/035007 (2013).
- 41 Zielis, S., Etzold, S., Zweifel, R., Eugster, W., Haeni, M. & Buchmann, N. NEP of a Swiss subalpine forest is significantly driven not only by current but also by previous year's weather. *Biogeosciences* **11**, 1627-1635, doi:10.5194/bg-11-1627-2014 (2014).
- 42 Imer, D., Merbold, L., Eugster, W. & Buchmann, N. Temporal and spatial variations of soil CO<sub>2</sub>, CH<sub>4</sub> and N<sub>2</sub>O fluxes at three differently managed



- grasslands. *Biogeosciences* **10**, 5931-5945, doi:10.5194/bg-10-5931-2013 (2013).
- 43 Ammann, C., Spirig, C., Leifeld, J. & Neftel, A. Assessment of the nitrogen and carbon budget of two managed temperate grassland fields. *Agric., Ecosyst. Environ.* **133**, 150-162, doi:https://doi.org/10.1016/j.agee.2009.05.006 (2009).
- 44 Guan, D. X., Wu, J. B., Zhao, X. S., Han, S. J., Yu, G. R., Sun, X. M. & Jin, C. J. CO<sub>2</sub> fluxes over an old, temperate mixed forest in northeastern China. *Agricultural and Forest Meteorology* **137**, 138-149, doi:10.1016/j.agrformet.2006.02.003 (2006).
- 45 Chen, S., Chen, J., Lin, G., Zhang, W., Miao, H., Wei, L., Huang, J. & Han, X. Energy balance and partition in Inner Mongolia steppe ecosystems with different land use types. *Agricultural and Forest Meteorology* **149**, 1800-1809, doi:https://doi.org/10.1016/j.agrformet.2009.06.009 (2009).
- 46 Kato, T., Tang, Y., Gu, S., Hirota, M., Du, M., Li, Y. & Zhao, X. Temperature and biomass influences on interannual changes in CO<sub>2</sub> exchange in an alpine meadow on the Qinghai-Tibetan Plateau. *Global Change Biol.* **12**, 1285-1298, doi:10.1111/j.1365-2486.2006.01153.x (2006).
- 47 Valentini, R., Matteucci, G., Dolman, A. J., Schulze, E. D., Rebmann, C., Moors, E. J., Granier, A., Gross, P., Jensen, N. O., Pilegaard, K., Lindroth, A., Grelle, A., Bernhofer, C., Grünwald, T., Aubinet, M., Ceulemans, R., Kowalski, A. S., Vesala, T., Rannik, Ü., Berbigier, P., Loustau, D., Guomundsson, J., Thorgeirsson, H., Ibrom, A., Morgenstern, K., Clement, R., Moncrieff, J., Montagnani, L., Minerbi, S. & Jarvis, P. G. Respiration as the main determinant of carbon balance in European forests. *Nature* **404**, 861-865, doi:10.1038/35009084 (2000).
- 48 Prescher, A.-K., Grünwald, T. & Bernhofer, C. Land use regulates carbon budgets in eastern Germany: From NEE to NBP. *Agricultural and Forest Meteorology* **150**, 1016-1025, doi:https://doi.org/10.1016/j.agrformet.2010.03.008 (2010).
- 49 Knohl, A., Schulze, E. D., Kolle, O. & Buchmann, N. Large carbon uptake by an unmanaged 250-year-old deciduous forest in Central Germany. *Agricultural and Forest Meteorology* **118**, 151-167, doi:10.1016/S0168-1923(03)00115-1 (2003).
- 50 Lindauer, M., Schmid, H. P., Grote, R., Mauder, M., Steinbrecher, R. & Wolpert, B. Net ecosystem exchange over a non-cleared wind-throw-disturbed upland spruce forest—Measurements and simulations. *Agricultural and Forest Meteorology* **197**, 219-234, doi:https://doi.org/10.1016/j.agrformet.2014.07.005 (2014).
- 51 Anthoni, P. M., Knohl, A., Rebmann, C., Freibauer, A., Mund, M., Ziegler, W., Kolle, O. & Schulze, E. D. Forest and agricultural land-use-dependent CO<sub>2</sub> exchange in Thuringia, Germany. *Global Change Biol.* **10**, 2005-2019, doi:10.1111/j.1365-2486.2004.00863.x (2004).
- 52 Don, A., Rebmann, C., Kolle, O., Scherer-Lorenzen, M. & Schulze, E. D. Impact of afforestation-associated management changes on the carbon balance of grassland. *Global Change Biol.* **15**, 1990-2002, doi:10.1111/j.1365-2486.2009.01873.x (2009).
- 53 Bernhofer, C., Aubinet, M., Clement, R., Grelle, A., Grünwald, T., Ibrom, A., Jarvis, P., Rebmann, C., Schulze, E. D. & Tenhunen, J. D. Spruce forests

- (Norway and Sitka spruce, including Douglas-fir): Carbon and water fluxes and balances, ecological and ecophysiological determinants. *Fluxes of Carbon, Water and Energy of European Forests* **163**, 99-123 (2003).
- 54 Westergaard-Nielsen, A., Lund, M., Hansen, B. U. & Tamstorf, M. P. Camera derived vegetation greenness index as proxy for gross primary production in a low Arctic wetland area. *ISPRS Journal of Photogrammetry and Remote Sensing* **86**, 89-99, doi:https://doi.org/10.1016/j.isprsjprs.2013.09.006 (2013).
- 55 Pilegaard, K., Hummelshøj, P., Jensen, N. O. & Chen, Z. Two years of continuous CO<sub>2</sub> eddy-flux measurements over a Danish beech forest. *Agricultural and Forest Meteorology* **107**, 29-41, doi:10.1016/S0168-1923(00)00227-6 (2001).
- 56 Lund, M., Falk, J. M., Friborg, T., Mbufong, H. N., Sigsgaard, C., Soegaard, H. & Tamstorf, M. P. Trends in CO<sub>2</sub> exchange in a high Arctic tundra heath, 2000–2010. *Journal of Geophysical Research: Biogeosciences* **117**, doi:10.1029/2011jg001901 (2012).
- 57 Sanz, M. J., Carrara, A. & Gimeno, C. Effects of a dry and warm summer conditions on CO<sub>2</sub> and energy fluxes from three Mediterranean ecosystems. *Geophys. Res. Abstr.* **6** (2004).
- 58 Reverter, B. R., Sánchez-Cañete, E. P., Resco, V., Serrano-Ortiz, P., Oyonarte, C. & Kowalski, A. S. Analyzing the major drivers of NEE in a Mediterranean alpine shrubland. *Biogeosciences* **7**, 2601-2611, doi:10.5194/bg-7-2601-2010 (2010).
- 59 Serrano-Ortiz, P., Domingo, F., Cazorla, A., Were, A., Cuezva, S., Villagarcía, L., Alados-Arboledas, L. & Kowalski, A. S. Interannual CO<sub>2</sub> exchange of a sparse Mediterranean shrubland on a carbonaceous substrate. *Journal of Geophysical Research: Biogeosciences* **114**, doi:10.1029/2009jg000983 (2009).
- 60 Perez-Priego, O., El-Madany, T. S., Migliavaca, M., Kowalski, A. S., Jung, M., Carrara, A., Kolle, O., Martín, M. P., Pacheco-Labrador, J., Moreno, G. & Reichstein, M. Evaluation of eddy covariance latent heat fluxes with independent lysimeter and sapflow estimates in a Mediterranean savannah ecosystem. *Agricultural and Forest Meteorology* **236**, 87-99, doi:10.1016/j.agrformet.2017.01.009 (2017).
- 61 Suni, T., Rinne, J., Reissell, A., Altimir, N., Keronen, P., Rannik, Ü., Dal Maso, M., Kulmala, M. & Vesala, T. Long-term measurements of surface fluxes above a Scots pine forest in Hyytiälä, southern Finland, 1996-2001. *Boreal Environ. Res.* **8**, 287-301 (2003).
- 62 Aurela, M., Riutta, T., Laurila, T., Tuovinen, J. P., Vesala, T., Tuittila, E. S., Rinne, J., Haapanala, S. & Laine, J. CO<sub>2</sub> exchange of a sedge fen in southern Finland - The impact of a drought period. *Tellus, Series B: Chemical and Physical Meteorology* **59**, 826-837, doi:10.1111/j.1600-0889.2007.00309.x (2007).
- 63 Koskinen, M., Minkkinen, K., Ojanen, P., Kämäräinen, M., Laurila, T. & Lohila, A. Measurements of CO<sub>2</sub> exchange with an automated chamber system throughout the year: challenges in measuring night-time respiration on porous peat soil. *Biogeosciences* **11**, 347-363, doi:10.5194/bg-11-347-2014 (2014).

- 64 Aurela, M., Lohila, A., Tuovinen, J.-P., Hatakka, J., Penttilä, T. & Laurila, T. Carbon dioxide and energy flux measurements in four northern-boreal ecosystems at Pallas. *Boreal Environ. Res.* **20**, 455-473 (2015).
- 65 Thum, T., Aalto, T., Laurila, T., Aurela, M., Kolari, P. & Hari, P. Parametrization of two photosynthesis models at the canopy scale in a northern boreal Scots pine forest. *Tellus, Series B: Chemical and Physical Meteorology* **59**, 874-890, doi:10.1111/j.1600-0889.2007.00305.x (2007).
- 66 Michelot, A., Eglin, T., Dufrêne, E., Lelarge-Trouverie, C. & Damesin, C. Comparison of seasonal variations in water-use efficiency calculated from the carbon isotope composition of tree rings and flux data in a temperate forest. *Plant, Cell and Environment* **34**, 230-244, doi:10.1111/j.1365-3040.2010.02238.x (2011).
- 67 Granier, A., Ceschia, E., Damesin, C., Dufrêne, E., Epron, D., Gross, P., Lebaube, S., Le Dantec, V., Le Goff, N., Lemoine, D., Lucot, E., Ottorini, J. M., Pontailler, J. Y. & Saugier, B. The carbon balance of a young Beech forest. *Funct. Ecol.* **14**, 312-325, doi:10.1046/j.1365-2435.2000.00434.x (2000).
- 68 Berbigier, P., Bonnefond, J. M. & Mellmann, P. CO<sub>2</sub> and water vapour fluxes for 2 years above Euroflux forest site. *Agricultural and Forest Meteorology* **108**, 183-197, doi:10.1016/S0168-1923(01)00240-4 (2001).
- 69 Rambal, S., Joffre, R., Ourcival, J. M., Cavender-Bares, J. & Rocheteau, A. The growth respiration component in eddy CO<sub>2</sub> flux from a Quercus ilex mediterranean forest. *Global Change Biol.* **10**, 1460-1469, doi:10.1111/j.1365-2486.2004.00819.x (2004).
- 70 Bonal, D., Bosc, A., Ponton, S., Goret, J.-Y., Burban, B., Gross, P., Bonnefond, J.-M., Elbers, J., Longdoz, B., Epron, D., Guehl, J.-M. & Granier, A. Impact of severe dry season on net ecosystem exchange in the Neotropical rainforest of French Guiana. *Global Change Biol.* **14**, 1917-1933, doi:10.1111/j.1365-2486.2008.01610.x (2008).
- 71 Chiti, T., Certini, G., Grieco, E. & Valentini, R. The role of soil in storing carbon in tropical rainforests: the case of Ankasa Park, Ghana. *Plant Soil* **331**, 453-461, doi:10.1007/s11104-009-0265-x (2010).
- 72 Grünzweig, J. M., Lin, T., Rotenberg, E., Schwartz, A. & Yakir, D. Carbon sequestration in arid-land forest. *Global Change Biol.* **9**, 791-799, doi:10.1046/j.1365-2486.2003.00612.x (2003).
- 73 Gilmanov, T. G., Soussana, J. F., Aires, L., Allard, V., Ammann, C., Balzarolo, M., Barcza, Z., Bernhofer, C., Campbell, C. L., Cernusca, A., Cescatti, A., Clifton-Brown, J., Dirks, B. O. M., Dore, S., Eugster, W., Fuhrer, J., Gimeno, C., Gruenwald, T., Haszpra, L., Hensen, A., Ibrom, A., Jacobs, A. F. G., Jones, M. B., Lanigan, G., Laurila, T., Lohila, A., G. Manca, Marcolla, B., Nagy, Z., Pilegaard, K., Pinter, K., Pio, C., Raschi, A., Rogiers, N., Sanz, M. J., Stefani, P., Sutton, M., Tuba, Z., Valentini, R., Williams, M. L. & Wohlfahrt, G. Partitioning European grassland net ecosystem CO<sub>2</sub> exchange into gross primary productivity and ecosystem respiration using light response function analysis. *Agriculture, Ecosystems and Environment* **121**, 93-120, doi:10.1016/j.agee.2006.12.008 (2007).
- 74 Sabbatini, S., Arriga, N., Bertolini, T., Castaldi, S., Chiti, T., Consalvo, C., Njakou Djomo, S., Gioli, B., Matteucci, G. & Papale, D. Greenhouse gas balance of cropland conversion to bioenergy poplar short-rotation coppice. *Biogeosciences* **13**, 95-113, doi:10.5194/bg-13-95-2016 (2016).

- 75 Valentini, R., De Angelis, P., Matteucci, G., Monaco, R., Dore, S. & Scarascia Mugnozza, G. E. Seasonal net carbon dioxide exchange of a beech forest with the atmosphere. *Global Change Biol.* **2**, 199-207, doi:10.1111/j.1365-2486.1996.tb00072.x (1996).
- 76 Fares, S., Savi, F., Muller, J., Matteucci, G. & Paoletti, E. Simultaneous measurements of above and below canopy ozone fluxes help partitioning ozone deposition between its various sinks in a Mediterranean Oak Forest. *Agricultural and Forest Meteorology* **198-199**, 181-191, doi:https://doi.org/10.1016/j.agrformet.2014.08.014 (2014).
- 77 Tirone, G., Dore, S., Matteucci, G., Greco, S. & Valentini, R. Evergreen Mediterranean forests. carbon and water fluxes, balances, ecological and ecophysiological determinants. *Fluxes of Carbon, Water and Energy of European Forests, Ecological Studies* **163**, 125-149 (2003).
- 78 Marcolla, B., Pitacco, A. & Cescatti, A. Canopy architecture and turbulence structure in a coniferous forest. *Boundary-Layer Meteorology* **108**, 39-59, doi:10.1023/A:1023027709805 (2003).
- 79 Marcolla, B. & Cescatti, A. Experimental analysis of flux footprint for varying stability conditions in an alpine meadow. *Agricultural and Forest Meteorology* **135**, 291-301, doi:10.1016/j.agrformet.2005.12.007 (2005).
- 80 Papale, D., Migliavacca, M., Cremonese, E., Cescatti, A., Alberti, G., Balzarolo, M., Belelli Marchesini, L., Canfora, E., Casa, R., Duce, P., Facini, O., Galvagno, M., Genesio, L., Gianelle, D., Magliulo, V., Matteucci, G., Montagnani, L., Petrella, F., Pitacco, A., Seufert, G., Spano, D., Stefani, P., Vaccari, F. P. & Valentini, R. in *Environmental Science and Engineering* Vol. 131 11-45 (2014).
- 81 Nardino, M., Georgiadis, T., Rossi, F., Ponti, F., Miglietta, F. & Magliulo, V. Primary productivity and evapotranspiration of a mixed forest. *Congress CNR-I.S.A. Fo*, 24-25 (2002).
- 82 Migliavacca, M., Meroni, M., Manca, G., Matteucci, G., Montagnani, L., Grassi, G., Zenone, T., Teobaldelli, M., Goded, I., Colombo, R. & Seufert, G. Seasonal and interannual patterns of carbon and water fluxes of a poplar plantation under peculiar eco-climatic conditions. *Agricultural and Forest Meteorology* **149**, 1460-1476, doi:10.1016/j.agrformet.2009.04.003 (2009).
- 83 Marcolla, B., Cescatti, A., Montagnani, L., Manca, G., Kerschbaumer, G. & Minerbi, S. Importance of advection in the atmospheric CO<sub>2</sub> exchanges of an alpine forest. *Agricultural and Forest Meteorology* **130**, 193-206, doi:10.1016/j.agrformet.2005.03.006 (2005).
- 84 Rey, A., Pegoraro, E., Tedeschi, V., De Parri, I., Jarvis, P. G. & Valentini, R. Annual variation in soil respiration and its components in a coppice oak forest in Central Italy. *Global Change Biol.* **8**, 851-866, doi:10.1046/j.1365-2486.2002.00521.x (2002).
- 85 Tedeschi, V., Rey, A., Manca, G., Valentini, R., Jarvis, P. J. & Borghetti, M. Soil respiration in a Mediterranean oak forest at different developmental stages after coppicing. *Global Change Biol.* **12**, 110-121, doi:10.1111/j.1365-2486.2005.01081.x (2006).
- 86 Galvagno, M., Wohlfahrt, G., Cremonese, E., Rossini, M., Colombo, R., Filippa, G., Julitta, T., Manca, G., Siniscalco, C., Morra Di Cella, U. & Migliavacca, M. Phenology and carbon dioxide source/sink strength of a

- subalpine grassland in response to an exceptionally short snow season. *Environ. Res. Lett.* **8**, doi:10.1088/1748-9326/8/2/025008 (2013).
- 87 Hirano, T., Hirata, R., Fujinuma, Y., Saigusa, N., Yamamoto, S., Harazono, Y., Takada, M., Inukai, K. & Inoue, G. CO<sub>2</sub> and water vapor exchange of a larch forest in northern Japan. *Tellus, Series B: Chemical and Physical Meteorology* **55**, 244-257, doi:10.1034/j.1600-0889.2003.00063.x (2003).
- 88 Ito, A. & Oikawa, T. A simulation model of the carbon cycle in land ecosystems (Sim-CYCLE): a description based on dry-matter production theory and plot-scale validation. *Ecol. Model.* **151**, 143-176, doi:https://doi.org/10.1016/S0304-3800(01)00473-2 (2002).
- 89 Jacobs, C. M. J., Jacobs, A. F. G., Bosveld, F. C., Hendriks, D. M. D., Hensen, A., Kroon, P. S., Moors, E. J., Nol, L., Schrier-Uijl, A. & Veenendaal, E. M. Variability of annual CO<sub>2</sub> exchange from Dutch grasslands. *Biogeosciences* **4**, 803-816, doi:10.5194/bg-4-803-2007 (2007).
- 90 Dolman, A. J., Moors, E. J. & Elbers, J. A. The carbon uptake of a mid latitude pine forest growing on sandy soil. *Agricultural and Forest Meteorology* **111**, 157-170, doi:10.1016/S0168-1923(02)00024-2 (2002).
- 91 Wolf, S., Eugster, W., Potvin, C., Turner, B. L. & Buchmann, N. Carbon sequestration potential of tropical pasture compared with afforestation in Panama. *Global Change Biol.* **17**, 2763-2780, doi:10.1111/j.1365-2486.2011.02460.x (2011).
- 92 Rodrigues, A., Pita, G., Mateus, J., Kurz-Besson, C., Casquilho, M., Cerasoli, S., Gomes, A. & Pereira, J. Eight years of continuous carbon fluxes measurements in a Portuguese eucalypt stand under two main events: Drought and felling. *Agricultural and Forest Meteorology* **151**, 493-507, doi:10.1016/j.agrformet.2010.12.007 (2011).
- 93 Pereira, J. S., Mateus, J. A., Aires, L. M., Pita, G., Pio, C., David, J. S., Andrade, V., Banza, J., David, T. S., Paço, T. A. & Rodrigues, A. Net ecosystem carbon exchange in three contrasting Mediterranean ecosystems - The effect of drought. *Biogeosciences* **4**, 791-802, doi:10.5194/bg-4-791-2007 (2007).
- 94 Corradi, C., Kolle, O., Walter, K., Zimov, S. A. & Schulze, E. D. Carbon dioxide and methane exchange of a north-east Siberian tussock tundra. *Global Change Biol.* **11**, 1910-1925, doi:10.1111/j.1365-2486.2005.01023.x (2005).
- 95 van der Molen, M. K., van Huissteden, J., Parmentier, F. J. W., Petrescu, A. M. R., Dolman, A. J., Maximov, T. C., Kononov, A. V., Karsanaev, S. V. & Suzdalov, D. A. The growing season greenhouse gas balance of a continental tundra site in the Indigirka lowlands, NE Siberia. *Biogeosciences* **4**, 985-1003, doi:10.5194/bg-4-985-2007 (2007).
- 96 Kurbatova, J., Li, C., Varlagin, A., Xiao, X. & Vygodskaya, N. Modeling carbon dynamics in two adjacent spruce forests with different soil conditions in Russia. *Biogeosciences* **5**, 969-980, doi:10.5194/bg-5-969-2008 (2008).
- 97 Belelli Marchesini, L., Papale, D., Reichstein, M., Vuichard, N., Tchebakova, N. & Valentini, R. Carbon balance assessment of a natural steppe of southern Siberia by multiple constraint approach. *Biogeosciences* **4**, 581-595, doi:10.5194/bg-4-581-2007 (2007).
- 98 Kurbatova, J., Arneth, A., Vygodskaya, N. N., Kolle, O., Varlagin, A. V., Milyukova, I. M., Tchebakova, N. M., Schulze, E. D. & Lloyd, J. Comparative

- ecosystem-atmosphere exchange of energy and mass in a European Russian and a central Siberian bog I. Interseasonal and interannual variability of energy and latent heat fluxes during the snowfree period. *Tellus, Series B: Chemical and Physical Meteorology* **54**, 497-513, doi:10.1034/j.1600-0889.2002.01354.x (2002).
- 99 Ardö, J., Mölder, M., El-Tahir, B. A. & Elkhidir, H. A. M. Seasonal variation of carbon fluxes in a sparse savanna in semi arid Sudan. *Carbon balance and management* **3**, 7-7, doi:10.1186/1750-0680-3-7 (2008).
- 100 Sagerfors, J., Lindroth, A., Grelle, A., Klemedtsson, L., Weslien, P. & Nilsson, M. B. Annual CO<sub>2</sub> exchange between a nutrient-poor, minerotrophic, boreal mire and the atmosphere. *Journal of Geophysical Research: Biogeosciences* **113**, doi:10.1029/2006JDG000306 (2008).
- 101 Johansson, T., Malmer, N., Crill, P. M., Friborg, T., Åkerman, J. H., Mastepanov, M. & Christensen, T. R. Decadal vegetation changes in a northern peatland, greenhouse gas fluxes and net radiative forcing. *Global Change Biol.* **12**, 2352-2369, doi:10.1111/j.1365-2486.2006.01267.x (2006).
- 102 Tagesson, T., Fensholt, R., Guiro, I., Rasmussen, M. O., Huber, S., Mbow, C., Garcia, M., Horion, S., Sandholt, I., Holm-Rasmussen, B., Götsche, F. M., Ridler, M.-E., Olén, N., Lundegard Olsen, J., Ehammer, A., Madsen, M., Olesen, F. S. & Ardö, J. Ecosystem properties of semiarid savanna grassland in West Africa and its relationship with environmental variability. *Global Change Biol.* **21**, 250-264, doi:10.1111/gcb.12734 (2015).
- 103 Medlyn, B. E., Berbigier, P., Clement, R., Grelle, A., Loustau, D., Linder, S., Wingate, L., Jarvis, P. G., Sigurdsson, B. D. & McMurtrie, R. E. Carbon balance of coniferous forests growing in contrasting climates: Model-based analysis. *Agricultural and Forest Meteorology* **131**, 97-124, doi:10.1016/j.agrformet.2005.05.004 (2005).
- 104 Billesbach, D., Bradford, J. & Torn, M. (2009-2012).
- 105 Billesbach, D., Bradford, J. & Torn, M. (2009-2012).
- 106 Gilmanov, T. G., Tieszen, L. L., Wylie, B. K., Flanagan, L. B., Frank, A. B., Haferkamp, M. R., Meyers, T. P. & Morgan, J. A. Integration of CO<sub>2</sub> flux and remotely-sensed data for primary production and ecosystem respiration analyses in the Northern Great Plains: Potential for quantitative spatial extrapolation. *Global Ecol. Biogeogr.* **14**, 271-292, doi:10.1111/j.1466-822X.2005.00151.x (2005).
- 107 Goldstein, A. H., Hultman, N. E., Fracheboud, J. M., Bauer, M. R., Panek, J. A., Xu, M., Qi, Y., Guenther, A. B. & Baugh, W. Effects of climate variability on the carbon dioxide, water, and sensible heat fluxes above a ponderosa pine plantation in the Sierra Nevada (CA). *Agricultural and Forest Meteorology* **101**, 113-129, doi:10.1016/S0168-1923(99)00168-9 (2000).
- 108 Vourlitis, G. L. & Oechel, W. C. Eddy covariance measurements of CO<sub>2</sub> and energy fluxes of an Alaskan tussock tundra ecosystem. *Ecology* **80**, 686-701, doi:10.1890/0012-9658(1999)080[0686:ECMOCA]2.0.CO;2 (1999).
- 109 Bowling, D. FLUXNET2015 US-Cop Corral Pocket, Dataset, doi:https://doi.org/10.18140/FLX/1440100 (2001-2007).

- 110 Ellsworth, D. S., Thomas, R., Crous, K. Y., Palmroth, S., Ward, E., Maier, C., Delucia, E. & Oren, R. Elevated CO<sub>2</sub> affects photosynthetic responses in canopy pine and subcanopy deciduous trees over 10 years: A synthesis from Duke FACE. *Global Change Biol.* **18**, 223-242, doi:10.1111/j.1365-2486.2011.02505.x (2012).
- 111 Heinsch, F. A., Heilman, J. L., McInnes, K. J., Cobos, D. R., Zuberer, D. A. & Roelke, D. L. Carbon dioxide exchange in a high marsh on the Texas Gulf Coast: Effects of freshwater availability. *Agricultural and Forest Meteorology* **125**, 159-172, doi:10.1016/j.agrformet.2004.02.007 (2004).
- 112 Meyers, T. (2002-2006).
- 113 Wehr, R., Munger, J. W., McManus, J. B., Nelson, D. D., Zahniser, M. S., Davidson, E. A., Wofsy, S. C. & Saleska, S. R. Seasonality of temperate forest photosynthesis and daytime respiration. *Nature* **534**, 680-683, doi:10.1038/nature17966 (2016).
- 114 Hollinger, D. Y., Goltz, S. M., Davidson, E. A., Lee, J. T., Tu, K. & Valentine, H. T. Seasonal patterns and environmental control of carbon dioxide and water vapour exchange in an ecotonal boreal forest. *Global Change Biol.* **5**, 891-902, doi:10.1046/j.1365-2486.1999.00281.x (1999).
- 115 Epstein, H. E., Calef, M. P., Walker, M. D., Chapin Iii, F. S. & Starfields, A. M. Detecting changes in arctic tundra plant communities in response to warming over decadal time scales. *Global Change Biol.* **10**, 1325-1334, doi:10.1111/j.1529-8817.2003.00810.x (2004).
- 116 Powell, T. L., Bracho, R., Li, J., Dore, S., Hinkle, C. R. & Drake, B. G. Environmental controls over net ecosystem carbon exchange of scrub oak in central Florida. *Agricultural and Forest Meteorology* **141**, 19-34, doi:10.1016/j.agrformet.2006.09.002 (2006).
- 117 Desai, A. R., Richardson, A. D., Moffat, A. M., Kattge, J., Hollinger, D. Y., Barr, A., Falge, E., Noormets, A., Papale, D., Reichstein, M. & Stauch, V. J. Cross-site evaluation of eddy covariance GPP and RE decomposition techniques. *Agricultural and Forest Meteorology* **148**, 821-838, doi:10.1016/j.agrformet.2007.11.012 (2008).
- 118 Cook, B. D., Davis, K. J., Wang, W., Desai, A., Berger, B. W., Teclaw, R. M., Martin, J. G., Bolstad, P. V., Bakwin, P. S., Yi, C. & Heilman, W. Carbon exchange and venting anomalies in an upland deciduous forest in northern Wisconsin, USA. *Agricultural and Forest Meteorology* **126**, 271-295, doi:10.1016/j.agrformet.2004.06.008 (2004).
- 119 Campbell, J. L., Sun, O. J. & Law, B. E. Supply-side controls on soil respiration among Oregon forests. *Global Change Biol.* **10**, 1857-1869, doi:10.1111/j.1365-2486.2004.00850.x (2004).
- 120 Vickers, D., Thomas, C. & Law, B. E. Random and systematic CO<sub>2</sub> flux sampling errors for tower measurements over forests in the convective boundary layer. *Agricultural and Forest Meteorology* **149**, 73-83, doi:10.1016/j.agrformet.2008.07.005 (2009).
- 121 Irvine, J., Law, B. E., Kurpius, M. R., Anthoni, P. M., Moore, D. & Schwarz, P. A. Age-related changes in ecosystem structure and function and effects on water and carbon exchange in ponderosa pine. *Tree Physiology* **24**, 753-763, doi:10.1093/treephys/24.7.753 (2004).

- 122 Law, B. E., Sun, O. J., Campbell, J., Van Tuyl, S. & Thornton, P. E. Changes in carbon storage and fluxes in a chronosequence of ponderosa pine. *Global Change Biol.* **9**, 510-524, doi:10.1046/j.1365-2486.2003.00624.x (2003).
- 123 Ruehr, N. K., Martin, J. G. & Law, B. E. Effects of water availability on carbon and water exchange in a young ponderosa pine forest: Above- and belowground responses. *Agricultural and Forest Meteorology* **164**, 136-148, doi:10.1016/j.agrformet.2012.05.015 (2012).
- 124 Schmid, H. P., Grimmond, C. S. B., Cropley, F., Offerle, B. & Su, H. B. Measurements of CO<sub>2</sub> and energy fluxes over a mixed hardwood forest in the mid-western United States. *Agricultural and Forest Meteorology* **103**, 357-374, doi:10.1016/S0168-1923(00)00140-4 (2000).
- 125 Gu, L., Meyers, T., Pallardy, S. G., Hanson, P. J., Yang, B., Heuer, M., Hosman, K. P., Riggs, J. S., Sluss, D. & Wullschlegel, S. D. Direct and indirect effects of atmospheric conditions and soil moisture on surface energy partitioning revealed by a prolonged drought at a temperate forest site. *Journal of Geophysical Research Atmospheres* **111**, doi:10.1029/2006JD007161 (2006).
- 126 Monson, R. K., Turnipseed, A. A., Sparks, J. P., Harley, P. C., Scott-Denton, L. E., Sparks, K. & Huxman, T. E. Carbon sequestration in a high-elevation, subalpine forest. *Global Change Biol.* **8**, 459-478, doi:10.1046/j.1365-2486.2002.00480.x (2002).
- 127 DeForest, J. L., Noormets, A., McNulty, S. G., Sun, G., Tenney, G. & Chen, J. Phenophases alter the soil respiration-temperature relationship in an oak-dominated forest. *International Journal of Biometeorology* **51**, 135-144, doi:10.1007/s00484-006-0046-7 (2006).
- 128 Nakai, T., Kim, Y., Busey, R. C., Suzuki, R., Nagai, S., Kobayashi, H., Park, H., Sugiura, K. & Ito, A. Characteristics of evapotranspiration from a permafrost black spruce forest in interior Alaska. *Polar Science* **7**, 136-148, doi:https://doi.org/10.1016/j.polar.2013.03.003 (2013).
- 129 Ikawa, H., Nakai, T., Busey, R. C., Kim, Y., Kobayashi, H., Nagai, S., Ueyama, M., Saito, K., Nagano, H., Suzuki, R. & Hinzman, L. Understory CO<sub>2</sub>, sensible heat, and latent heat fluxes in a black spruce forest in interior Alaska. *Agricultural and Forest Meteorology* **214-215**, 80-90, doi:https://doi.org/10.1016/j.agrformet.2015.08.247 (2015).
- 130 Lipson, D. A., Wilson, R. F. & Oechel, W. C. Effects of elevated atmospheric CO<sub>2</sub> on soil microbial biomass, activity, and diversity in a chaparral ecosystem. *Appl. Environ. Microbiol.* **71**, 8573-8580, doi:10.1128/AEM.71.12.8573-8580.2005 (2005).
- 131 Clark, K. L., Gholz, H. L., Moncrieff, J. B., Cropley, F. & Loescher, H. W. Environmental controls over net exchanges of carbon dioxide from contrasting Florida ecosystems. *Ecol. Appl.* **9**, 936-948, doi:10.1890/1051-0761(1999)009[0936:ECONEO]2.0.CO;2 (1999).
- 132 Scott, R. L., Biederman, J. A., Hamerlynck, E. P. & Barron-Gafford, G. A. The carbon balance pivot point of southwestern U.S. semiarid ecosystems: Insights from the 21st century drought. *Journal of Geophysical Research: Biogeosciences* **120**, 2612-2624, doi:10.1002/2015jg003181 (2015).
- 133 Scott, R. L., Jenerette, G. D., Potts, D. L. & Huxman, T. E. Effects of seasonal drought on net carbon dioxide exchange from a woody-plant-encroached



- semiarid grassland. *Journal of Geophysical Research: Biogeosciences* **114**, doi:10.1029/2008JG000900 (2009).
- 134 Desai, A. R., Bolstad, P. V., Cook, B. D., Davis, K. J. & Carey, E. V. Comparing net ecosystem exchange of carbon dioxide between an old-growth and mature forest in the upper Midwest, USA. *Agricultural and Forest Meteorology* **128**, 33-55, doi:10.1016/j.agrformet.2004.09.005 (2005).
- 135 Ma, S., Baldocchi, D., Wolf, S. & Verfaillie, J. Slow ecosystem responses conditionally regulate annual carbon balance over 15 years in Californian oak-grass savanna. *Agricultural and Forest Meteorology* **228-229**, 252-264, doi:10.1016/j.agrformet.2016.07.016 (2016).
- 136 Gough, C. M., Vogel, C. S., Schmid, H. P., Su, H. B. & Curtis, P. S. Multi-year convergence of biometric and meteorological estimates of forest carbon storage. *Agricultural and Forest Meteorology* **148**, 158-170, doi:10.1016/j.agrformet.2007.08.004 (2008).
- 137 Nave, L. E., Gough, C. M., Maurer, K. D., Bohrer, G., Hardiman, B. S., Le Moine, J., Munoz, A. B., Nadelhoffer, K. J., Sparks, J. P., Strahm, B. D., Vogel, C. S. & Curtis, P. S. Disturbance and the resilience of coupled carbon and nitrogen cycling in a north temperate forest. *Journal of Geophysical Research: Biogeosciences* **116**, doi:10.1029/2011JG001758 (2011).
- 138 Ma, S., Baldocchi, D. D., Mambelli, S. & Dawson, T. E. Are temporal variations of leaf traits responsible for seasonal and inter-annual variability in ecosystem CO<sub>2</sub> exchange? *Funct. Ecol.* **25**, 258-270, doi:10.1111/j.1365-2435.2010.01779.x (2011).
- 139 Noormets, A., Chen, J. & Crow, T. R. Age-dependent changes in ecosystem carbon fluxes in managed forests in northern Wisconsin, USA. *Ecosystems* **10**, 187-203, doi:10.1007/s10021-007-9018-y (2007).
- 140 Scott, R. L. Using watershed water balance to evaluate the accuracy of eddy covariance evaporation measurements for three semiarid ecosystems. *Agricultural and Forest Meteorology* **150**, 219-225, doi:https://doi.org/10.1016/j.agrformet.2009.11.002 (2010).
- 141 Chen, J., Falk, M., Euskirchen, E., Paw U, K. T., Suchanek, T. H., Ustin, S. L., Bond, B. J., Brosofske, K. D., Phillips, N. & Bi, R. Biophysical controls of carbon flows in three successional Douglas-fir stands based on eddy-covariance measurements. *Tree Physiology* **22**, 169-177, doi:10.1093/treephys/22.2-3.169 (2002).
- 142 Roupsard, O., Bonnefond, J.-M., Irvine, M., Berbigier, P., Nouvellon, Y., Dauzat, J., Taga, S., Hamel, O., Jourdan, C., Saint-André, L., Mialet-Serra, I., Labouisse, J.-P., Epron, D., Joffre, R., Braconnier, S., Rouzière, A., Navarro, M. & Bouillet, J.-P. Partitioning energy and evapo-transpiration above and below a tropical palm canopy. *Agricultural and Forest Meteorology* **139**, 252-268, doi:https://doi.org/10.1016/j.agrformet.2006.07.006 (2006).
- 143 Archibald, S. A., Kirton, A., van der Merwe, M. R., Scholes, R. J., Williams, C. A. & Hanan, N. Drivers of inter-annual variability in Net Ecosystem Exchange in a semi-arid savanna ecosystem, South Africa. *Biogeosciences* **6**, 251-266, doi:10.5194/bg-6-251-2009 (2009).
